# Supplementary material
Source: publisher figshare collection journal article supplement (https://gsajournals.figshare.com/ndownloader/files/25674320)
Supplement: Supplementary file 1 [file 25674320]

## Sheet: File guide
Supplementary file guide
Sheets
PHAST & RAST
Litterature, tRNA
Rho-independent terminator pred
PHAST & RAST
Columns	Sub-columns	Descriptions
	Algorithm
General	Strand	+/- orientation
General	CDS start	Start position of the annotation
General	CDS Stop	End position of the annotation
General	Length	length (bp) of the annotation
PHAST	Blast hit	annotation hit
PHAST	E-value	significance of the annotation hit
RAST	Function	annotation function hit
RAST	Sub-system	Subsystem of the annotated CDS
RAST	Database	Searching database
P22	Description	Description of the CDS
P22	CDS name	Name of the CDS
P22	DNA identity	% identity between P22 and Pl annotation
P22	Protein Identity	% identity between P22 and Pl translation of the annotation
ST64T	Description	Description of the CDS
ST64T	Locus tag	locus tag
ST64T	Coverage	Coverage of the aligned annotations
ST64T	Identity	% identity between ST64T and Pl translation of the annotation
Final annotation	Name	Retained name after checking the different parameters. Used in figure 2.
Final annotation	Product
Final annotation	Note
Literature, tRNA
Table 1	In the literature	Annotation gathered from the literature
Table 2	tRNA predictions	tRNA predictions from tRNAScan-SE
Rho-independent terminator pred
Arnold	Start	Start bp of the predicted terminator
	Program	Which algorithm predicted it
	Strand	orientation of the predicted terminator
	Sequence	Sequence of the predicted terminator
Softberry (FindTerm)	Strand	orientation of the predicted terminator
	Start	Start bp of the predicted terminator
	Length	Length of the predicted terminator
	Score	Softberry strength score
	Local context	RNA sequence of the predicted terminator and around

## Sheet: PHAST & RAST
	General				PHAST		RAST			P22				ST64T				Final annotation
Algorithm	Strand	Start	Stop	Length	BLAST Hit	E-Value	Function	Subsystem	Database	Description	CDS name	DNA identity	Protein identity	Description	locus tag	Coverage	Protein Identity	Name	Product	Note
RAST	+	1	465	465	-	-	Phage terminase, small subunit	Phage packaging machinery	SEED	terminase small subunit	3 CDS	90.8	96.1	terminase small subunit	ST64Tp51	100	100	3	Phage terminase, small subunit
PHAST & RAST	+	467	1966	1500	PHAGE_Salmon_ST64T_NC_004348: terminase large subunit; PP_00001; phage(gi24371583)	0	IS, phage, Tn; Transposon-related functions	- none -	SEED	terminase large subunit	2 CDS	96.3	98.8	terminase large subunit	ST64T052	100	100	2	Phage terminase, large subunit
PHAST	+	1035	1047	12	attL	0	-	-	-	-	-	-	-	-	-	-	-	-	-
PHAST & RAST	+	1966	4143	2178	PHAGE_Salmon_ST64T_NC_004348: portal protein; PP_00002; phage(gi24371585)	0	Phage portal protein	Phage packaging machinery	SEED	portal protein	1 CDS	95	98.1	portal protein	ST64Tp53	100	100	1	Phage portal protein
PHAST & RAST	+	4157	5068	912	PHAGE_Salmon_ST64T_NC_004348: scaffolding protein; PP_00003; phage(gi24371586)	0	Phage capsid and scaffold	Phage capsid proteins	SEED	scaffolding protein	8 CDS	98.4	99.3	scaffolding protein	ST64Tp54	100	100	8	Phage scaffolding protein
PHAST & RAST	+	5068	6360	1293	PHAGE_Salmon_ST64T_NC_004348: coat protein; PP_00004; phage(gi24371587)	0	Phage coat protein	- none -	SEED	coat protein	5 CDS	92.9	99.1	coat protein	ST64Tp55	100	100	5	Phage major capsid (coat) protein
PHAST & RAST	+	6401	6961	561	PHAGE_Salmon_ST64T_NC_004348: hypothetical protein; PP_00005; phage(gi24371588)	1.24e-134	ORF54	- none -	SEED	-	-	-	-	hypothetical protein	ST64Tp56	100	99.5	orf186	hypothetical protein	also called orf186 in ST64T
PHAST & RAST	+	6945	7445	501	PHAGE_Salmon_ST64T_NC_004348: capsid portal closure protein; PP_00006; phage(gi24371589)	8.54e-122	DNA stabilization, phage-associated	- none -	SEED	head completion protein	4 CDS	91.4	97	capsid portal closure protein	ST64Tp57	100	100	4	Head completion protein (P22 gp4)
PHAST & RAST	+	7405	8823	1419	PHAGE_Salmon_ST64T_NC_004348: capsid portal closure protein; PP_00007; phage(gi24371590)	0	DNA stabilization, phage-associated	- none -	SEED	head completion protein	10 CDS	88.3	95.8	capsid portal closure protein	ST64Tp58	100	100	10	Head completion protein (P22 gp10)
PHAST & RAST	+	8827	9465	639	PHAGE_Salmon_ST64T_NC_004348: capsid portal closure protein; PP_00008; phage(gi24371591)	2.71e-152	DNA stabilization, phage-associated	- none -	SEED	head completion protein	26 CDS	67.7	63.1	capsid portal closure protein	ST64Tp59	100	100	26	Head completion protein/tail needle (P22 gp26)
PHAST & RAST	+	9465	9920	456	PHAGE_Salmon_ST64T_NC_004348: head assembly protein; PP_00009; phage(gi24371592)	3.32e-111	Phage capsid and scaffold	Phage capsid proteins	SEED	head assembly protein	14 CDS	92.3	94	head assembly protein	ST64Tp60	100	100	14	Head stabilization protein (P22 gp14)
PHAST & RAST	+	9923	10612	690	PHAGE_Salmon_ST64T_NC_004348: DNA transfer protein; PP_00010; phage(gi24371593)	2.55e-155	Phage DNA transfer protein	- none -	SEED	injection protein	7 CDS	64.6	65.2	DNA transfer protein	ST64Tp61	100	100	7	Phage DNA injection protein (P22 gp7)
PHAST & RAST	+	10622	11956	1335	PHAGE_Salmon_ST64T_NC_004348: DNA transfer protein; PP_00011; phage(gi24371594)	0	Phage DNA transfer protein	- none -	SEED	injection protein	20 CDS	66.8	62	DNA transfer protein	ST64Tp62	100	100	20	Phage DNA injection protein (P22 gp20)
PHAST & RAST	+	11956	13932	1977	PHAGE_Salmon_ST64T_NC_004348: DNA transfer protein; PP_00012; phage(gi24371595)	0	hypothetical protein	- none -	SEED	injection protein	16 CDS	40	29.8	DNA transfer protein	ST64Tp63	100	100	16	Phage DNA injection protein (P22 gp16)
RAST	-	14037	14171	135	-	-	hypothetical protein	- none -	SEED	-	-	-	-	-	-	-	-	-	-
PHAST	+	14071	14364	294	PHAGE_Entero_ST104_NC_005841: ORF62; PP_00013; phage(gi46358710)	5.32e-65	-	-	-	-	-	-	-	-	-	-	-	orf162	hypothetical protein	orf162 in ST104
RAST	+	14203	14364	162	-	-	lipoprotein, putative	- none -	SEED	-	-	-	-	-	-	-	-	-	-
PHAST & RAST	-	14385	14633	249	PHAGE_Salmon_ST64T_NC_004348: regulatory protein; PP_00014; phage(gi24371596)	3.74e-53	Mnt	- none -	SEED	mnt	Mnt	57.5	59	mnt	ST64Tp64	100	100	mnt	Mnt
PHAST & RAST	+	14769	16772	2004	PHAGE_Salmon_ST64T_NC_004348: tail spike protein; PP_00015; phage(gi24371597)	0	Phage tail fibers	Phage tail fiber proteins	SEED	tailspike protein	9 CDS	98.3	98.7	tail spike protein	ST64Tp65	100	100	9	Phage tailspike/ endorhamnosidase (P22 gp9)
PHAST & RAST	-	16831	18288	1458	PHAGE_Salmon_ST64T_NC_004348: O-antigen conversion protein C; PP_00016; phage(gi24371535)	0	hypothetical protein	- none -	SEED	O-antigen conversion protein C	gtrC	99.2	98.8	gtrC	ST64Tp01	100	100	gtrC	O-antigen conversion, gtrC	similar to P22 gtrC
PHAST & RAST	-	18278	19210	933	PHAGE_Salmon_ST64T_NC_004348: O-antigen conversion protein B; PP_00017; phage(gi24371536)	0	Bactoprenol glucosyl transferase	- none -	SEED	O-antigen conversion protein	gtrB		99.7	gtrB	ST64Tp02	100	100	gtrB	Bactoprenol glycosyl transferase, O-antigen conversion gtrB
None	-	19207	19569	363	-	-	-	-	-	O-antigen conversion protein	gtrA	100	100	gtrA	ST64Tp03	100	100	gtrA	O-antigen conversion, gtrA
PHAST & RAST	+	19309	19560	252	hypothetical; PP_00018	0	hypothetical protein	- none -	SEED	-	-	-	-	-	-	-	-	-	-
PHAST & RAST	-	19918	21081	1164	PHAGE_Salmon_ST64T_NC_004348: integrase; PP_00019; phage(gi24371538)	0	Phage integrase	- none -	SEED	int	int	98.4	98.4	int	ST64Tp04	100	100	int	Phage integrase
None	-	20958	21308	351	-	-	-	-	-	xis	Xis	99.1	100	xis	ST64Tp05	100	100	xis	Xis
PHAST & RAST	-	21311	21940	630	PHAGE_Salmon_ST64T_NC_004348: Eac protein; PP_00020; phage(gi24371540)	2.38e-155	Phage EaC protein	- none -	SEED	eaC	eaC	94.5	91.5	eaC	ST64Tp06	100	100	eaC	Phage EaC protein
PHAST & RAST	-	22041	22220	180	PHAGE_Salmon_ST64T_NC_004348: hypothetical protein; PP_00021; phage(gi24371541)	9.19e-37	Phage EaG protein	- none -	SEED	eaG	eaG	100	100	eaG	ST64Tp07	100	100	eaG	Phage EaG protein
PHAST & RAST	-	22317	22862	546	PHAGE_Salmon_ST64T_NC_004348: hypothetical protein; PP_00022; phage(gi24371542)	8.64e-134	hypothetical protein	- none -	SEED	-	-	-	-	hypothetical protein	ST64Tp08	100	100	eaA-2	Phage EaA protein	similar to C-terminal part of P22 eaA
PHAST & RAST	-	22859	23674	816	PHAGE_Salmon_ST64T_NC_004348: hypothetical protein; PP_00023; phage(gi24371543)	0	Phage EaA protein	- none -	SEED	-	-	-	-	hypothetical protein	ST64Tp09	100	100	eaA-1	Phage EaA protein	similar to N-terminal part of P22 eaA
PHAST & RAST	-	23685	23948	264	PHAGE_Salmon_ST64T_NC_004348: hypothetical protein; PP_00024; phage(gi24371544)	7.45e-60	hypothetical protein	- none -	SEED	-	-	-	-	hypothetical protein	ST64Tp10	100	100	orf87	hypothetical protein	orf87 in ST64T phage
PHAST	-	23936	24175	240	PHAGE_Salmon_vB_SemP_Emek_NC_018275: hypothetical protein; PP_00025; phage(gi399498824)	5.25e-54	-	-	-	-	-	-	-	-	-	-	-	orf91	hypothetical protein	orf91 in EMEK phage with start at 24211
PHAST & RAST	-	24245	24475	231	PHAGE_Salmon_vB_SemP_Emek_NC_018275: hypothetical protein; PP_00026; phage(gi399498825)	8.27e-52	hypothetical protein	- none -	SEED	-	-	-	-	-	-	-	-	orf74c	hypothetical protein	orf74c in EMEK phage
PHAST & RAST	-	24478	24999	522	PHAGE_Salmon_ST64T_NC_004348: hypothetical protein; PP_00027; phage(gi24371545)	1.12e-73	Phage protein	- none -	SEED	-	-	-	-	-	-	-	-	eaD	EaD
None	-	24478	24807	329	-	-	-	-	-	-	-	-	-	hypothetical protein	St64Tp11/p12	-	-	orf109	hypothetical protein	orf109 in ST64T with stop at 24807
PHAST & RAST	-	24996	25373	378	PHAGE_Salmon_ST64T_NC_004348: hypothetical protein; PP_00028; phage(gi24371547)	2.17e-88	Eae protein	- none -	SEED	eaE	eaE	36.4	32.1	eaE	ST64Tp13	100	100	eaE	EaE protein
PHAST & RAST	-	25370	25540	171	PHAGE_Salmon_ST64T_NC_004348: hypothetical protein; PP_00029; phage(gi24371598)	2.88e-34	Phage protein	- none -	SEED	hypothetical protein	orf56	34.7	26.3	hypothetical protein	ST64Tp14	100	100	orf56	hypothetical protein	orf56 in ST64T phage
PHAST & RAST	-	25551	25844	294	PHAGE_Salmon_ST64T_NC_004348: hypothetical protein; PP_00030; phage(gi24371548)	9.88e-68	hypothetical protein	- none -	SEED	abc2	abc2	95.2	94.8	hypothetical protein	ST64Tp15	100	100	abc2	anti-RecBCD	similar to P22 abc2
PHAST & RAST	-	25891	26175	285	PHAGE_Salmon_ST64T_NC_004348: hypothetical protein; PP_00031; phage(gi24371549)	8.22e-65	Phage anti-RecBCD 1	- none -	SEED	abc1	abc1	97.9	95.7	hypothetical protein	ST64Tp16	100	100	abc1	anti-RecBCD	similar to P22 abc1
PHAST & RAST	-	26175	26882	708	PHAGE_Salmon_ST64T_NC_004348: hypothetical protein; PP_00032; phage(gi24371550)	6.27e-177	Phage essential recombination function protein, Erf	- none -	SEED	Erf	Erf	44.8	30.8	hypothetical protein	ST64Tp17	100	100	erf	Phage essential recombination function protein Erf
PHAST & RAST	-	26891	27079	189	PHAGE_Salmon_ST64T_NC_004348: hypothetical protein; PP_00033; phage(gi24371551)	3.23e-40	Phage protein (ACLAME 697)	- none -	SEED	-	-	-	-	hypothetical protein	ST64Tp18	100	100	orf66	hypothetical protein	orf66 in ST64T phage
PHAST & RAST	-	27076	27189	114	PHAGE_Salmon_ST64T_NC_004348: hypothetical protein; PP_00034; phage(gi24371599)	1.37e-19	Phage Kil protein (host killing) (ACLAME 545)	- none -	SEED	kill	kill	58.6	12.9	kil	ST64Tp19	100	100	kil	Phage Kil protein (host killing) (ACLAME 545)
PHAST & RAST	-	27182	27328	147	PHAGE_Salmon_ST64T_NC_004348: hypothetical protein; PP_00035; phage(gi24371552)	9.19e-29	Phage regulatory protein	- none -	SEED	c3	c3	56.1	55.6	hypothetical protein	ST64Tp20	100	100	cIII	CIII phage regulatory protein
PHAST & RAST	-	27413	27727	315	PHAGE_Salmon_ST64T_NC_004348: superinfection exclusion protein; PP_00036; phage(gi24371553)	9.46e-73	Superinfection exclusion protein (Protein gp17)	- none -	SEED	hypothetical protein	17 CDS	89.5	92.2	superinfection exclusion protein	ST64Tp21	100	100	17	(P22 gp17)
PHAST & RAST	-	27899	28438	540	PHAGE_Salmon_ST64T_NC_004348: hypothetical protein; PP_00037; phage(gi24371554)	2.6e-125	Phage pentapeptide repeat family protein (ACLAME 560)	- none -	SEED	-	-	-	-	hypothetical protein	ST64Tp22	77.3	97.3	orf232	Phage pentapeptide repeat familly protein (ACLAME 560)	orf232 in ST64T phage
PHAST	-	28522	28674	153	PHAGE_Salmon_ST64T_NC_004348: hypothetical protein; PP_00038; phage(gi24371555)	2.68e-28	-	-	-	-	-	-	-	-	-	-	-	-	-
RAST	-	28522	28716	195	-	-	antirestriction protein	- none -	SEED	restriction alleviaion	raI	96.4	96.9	raI	ST64Tp23	100	100	raI	antirestriction protein RaI
PHAST & RAST	-	28795	29133	339	PHAGE_Salmon_ST64T_NC_004348: antitermination protein; PP_00039; phage(gi24371556)	1.37e-77	Phage antitermination protein N	- none -	SEED	-	-	-	-	antiterminaison	ST64Tp24	100	100	24	phage antiterminaison protein N (P22 gp24)
RAST	+	29356	29553	198	-	-	FIG01048878: hypothetical protein	- none -	SEED	-	-	-	-	-	-	-	-	orf42	hypothetical protein
PHAST & RAST	-	29691	30395	705	PHAGE_Salmon_ST64T_NC_004348: repressor protein; PP_00040; phage(gi24371557)	4.5e-174	FIG017723: Putative cI prophage repressor protein	- none -	SEED	prophage repressor	c2	57	50.4	repressor protein	ST64Tp25	100	100	cII	CII prophage repressor protein	homolog to P22 c2 and lambda cI, bearing the frameshift mutation cII 101
PHAST & RAST	+	30472	30687	216	PHAGE_Salmon_ST64T_NC_004348: antirepressor protein; PP_00041; phage(gi24371558)	4.24e-47	putative repressor protein	- none -	SEED	repressor	cro	35.6	19.4	cro	ST64Tp26	100	100	cro	Cro repressor protein
PHAST & RAST	+	30798	31079	282	PHAGE_Salmon_ST64T_NC_004348: transcriptional activator; PP_00042; phage(gi24371559)	7.78e-62	cII	- none -	SEED	transcription activator	c1	57.8	48.4	transcriptional activator	ST64Tp27	100	98.9	cI	CI activator prophage repressor gene transcription protein	homolog to P22 c1 and lambda cII, defective mutation cI-40
RAST	+	31114	31260	147	-	-	Phage protein	- none -	SEED	hypothetical protein	ORF48	100	100	-	-	-	-	orf48	hypothetical protein	orf48 in P22 phage original annotation, P22 gp50
PHAST & RAST	+	31253	32152	900	PHAGE_Salmon_ST64T_NC_004348: hypothetical protein; PP_00043; phage(gi24371560)	0	Phage DNA replication protein O	- none -	SEED	hypothetical protein	18 CDS	28.4	17	hypothetical protein	ST64Tp28	100	100	18	Phage DNA replication protein O (P22 gp18)
PHAST & RAST	+	32142	33578	1437	PHAGE_Salmon_ST64T_NC_004348: hypothetical protein; PP_00044; phage(gi24371561)	0	DNA helicase (EC 3.6.4.12), phage-associated	- none -	SEED	hypothetical protein	12 CDS	44.3	30	hypothetical protein	ST64Tp29	100	100	12	DnaB-like DNA helicase (EC 3.6.4.12) (P22 gp12)
PHAST & RAST	+	33653	33925	273	PHAGE_Salmon_ST64T_NC_004348: hypothetical protein; PP_00045; phage(gi24371562)	2.66e-61	Phage protein (ACLAME 1442)	- none -	SEED	-	-	-	-	hypothetical protein	ST64Tp30	100	100	orf90	Phage protein (ACLAME 1442)	orf90 in ST64T phage
PHAST & RAST	+	33938	34144	207	PHAGE_Salmon_ST64T_NC_004348: hypothetical protein; PP_00046; phage(gi24371563)	8e-45	Phage protein	- none -	SEED	-	-	-	-	hypothetical protein	ST64Tp31	100	100	orf69	hypothetical protein	orf69 in ST64T phage
PHAST & RAST	+	34156	34404	249	PHAGE_Salmon_ST64T_NC_004348: hypothetical protein; PP_00047; phage(gi24371564)	5.02e-54	FIG00642860: hypothetical protein	- none -	SEED	-	-	-	-	hypothetical protein	ST64Tp32	100	100	orf86	FIG00642860, hypothetical protein	orf86 in ST64T phage
PHAST	+	34407	34703	297	PHAGE_Salmon_ST64T_NC_004348: hypothetical protein; PP_00048; phage(gi24371565)	9.59e-66	-	-	-	-	-	-	-	hypothetical protein	ST64Tp33	100	100	orf98	hypothetical protein	orf98 in ST64T phage
PHAST & RAST	+	34660	35106	447	PHAGE_Salmon_vB_SemP_Emek_NC_018275: NinB; PP_00049; phage(gi399498846)	1.51e-99	Phage NinB DNA recombination	- none -	SEED	ninB	ninB	48.7	42	ninB	ST64Tp34	100	100	ninB	NinB DNA recombination
None	+	35076	35276	201	-	-	-	-	-	ninD	ninD	97.1	96.5	ninD	ST64Tp35	100	100	ninD	NinD
None	+	35243	35419	177	-	-	-	-	-	ninE	ninE	95.5	96.6	ninE	ST64Tp36	100	100	ninE	NinE
PHAST & RAST	+	35422	35763	342	PHAGE_Salmon_ST64T_NC_004348: hypothetical protein; PP_00050; phage(gi24371569)	7.51e-82	Phage NinX	- none -	SEED	hypothetical protein	ninX	70.9	56.9	ninX	ST64Tp37	100	100	ninX	NinX
PHAST & RAST	+	35756	35929	174	PHAGE_Salmon_ST64T_NC_004348: hypothetical protein; PP_00051; phage(gi24371570)	3.42e-35	Phage NinF	- none -	SEED	hypothetical protein	ninF	81.4	86	ninF	ST64Tp38	100	100	ninF	NinF
PHAST & RAST	+	35922	36224	303	PHAGE_Salmon_ST64T_NC_004348: hypothetical protein; PP_00052; phage(gi24371571)	1.32e-69	Phage protein	- none -	SEED	-	-	-	-	hypothetical protein	ST64Tp39	100	100	orf101	hypothetical protein	orf101 in ST64T phage
PHAST & RAST	+	36217	36507	291	PHAGE_Salmon_ST64T_NC_004348: hypothetical protein; PP_00053; phage(gi24371572)	1.39e-67	Uncharacterized protein YbcO	- none -	SEED	-	-	-	-	YbcO	ST64Tp40	100	100	orf136	hypothetical protein	orf136 in ST64T phage
PHAST & RAST	+	36504	36899	396	PHAGE_Salmon_ST64T_NC_004348: endodeoxyribonuclease; PP_00054; phage(gi24371573)	9.61e-94	Holliday junction resolvase / Crossover junction endodeoxyribonuclease rusA (EC 3.1.22.-)	- none -	SEED	-	-	-	-	rus	ST64Tp41	100	100	rusA	Holliday junction resolvase / Crossover junction endodeoxyribonuclease rusA (EC 3.1.22.-)
PHAST & RAST	+	36896	37099	204	PHAGE_Entero_UAB_Phi20_NC_031019: hypothetical protein; PP_00055; phage(gi100012)	6.78e-44	Phage NinH	- none -	SEED	hypothetical protein	ninH	94.6	100	ninH	ST64Tp42	100	100	ninH	NinH
PHAST & RAST	+	37080	37259	180	PHAGE_Salmon_ST64T_NC_004348: hypothetical protein; PP_00056; phage(gi24371575)	1.21e-36	hypothetical protein	- none -	SEED	hypothetical protein	ninZ	93.9	93.2	ninZ	ST64Tp43	100	100	ninZ	NinZ
PHAST & RAST	+	37256	37774	519	PHAGE_Salmon_118970_sal4_NC_030919: hypothetical protein; PP_00057; phage(gi100037)	5.77e-127	hypothetical protein	- none -	SEED	transcription antitermination protein	23 CDS	24	12.6	antiterminaison protein	ST64Tp44	100	100	23	Late operon transcription antiterminaison protein (P22 gp23; phage 21 gpQ)
PHAST	+	37828	37839	12	attR	0	-	-	-	-	-	-	-	-	-	-	-	-	-
RAST	+	37837	37908	72	-	-	tRNA-Asn-GTT	- none -	SEED	-	-	-	-	-	-	-	-	-	-
None	+	38174	38491	318	-	-	-	-	-	-	13 CDS	38.8	33.6	holin protein	ST64Tp45	100	100	13	putative holin protein
PHAST & RAST	+	38174	38323	150	PHAGE_Salmon_ST64T_NC_004348: holin protein; PP_00058; phage(gi24371577)	2.23e-29	Putative holin protein	- none -	SEED	13 holin release of gp19 through inner membrane	13' CDS	23	15.9	holin protein	ST64Tp45	47.2	100	13	putative holin protein	truncated gene
PHAST & RAST	+	38478	38876	399	PHAGE_Salmon_ST64T_NC_004348: hypothetical protein; PP_00059; phage(gi24371578)	1e-93	Putative phage-related protein precursor	- none -	SEED	Lysozyme	19 CDS	38.3	17	hypothetial protein	ST64Tp46	100	100	19	endolysin
PHAST & RAST	+	38873	39325	453	PHAGE_Salmon_ST64T_NC_004348: hypothetical protein; PP_00060; phage(gi24371579)	1.8e-105	Rz endopeptidase from lambdoid phage	- none -	SEED	hypothetical protein	15 CDS	76.4	66	hypothetial protein	ST64Tp47	100	100	15	Lambda Rz-like lysis protein (P22 gp15); spanin subunit
None	+	39060	39272	213	-	-	-	-	-	hypothetical protein	rz1	95.7	93.4	hypothetial protein	ST64Tp48	100	100	rz1	spanin subunit
PHAST & RAST	+	39621	39863	243	PHAGE_Entero_ST104_NC_005841: hypothetical protein; PP_00061; phage(gi46358693)	2.01e-48	hypothetical protein	- none -	SEED	-	-	-	-	-	-	-	-	orf118	hypothetical protein	orf118 in ST64T with start at 39507 (Gilcrease et al. 2005)
PHAST & RAST	+	39867	40256	390	PHAGE_Salmon_ST64T_NC_004348: hypothetical protein; PP_00062; phage(gi24371581)	1.9e-94	Phage protein	- none -	SEED	-	-	-	-	hypothetial protein	ST64Tp49	100	100	orf129	hypothetical protein	orf129 in ST64T and L (Gilcrease et al. 2005)
PHAST & RAST	+	40256	40660	405	PHAGE_Salmon_ST64T_NC_004348: hypothetical protein; PP_00063; phage(gi24371582)	4.85e-93	Phage tail fibers	Phage tail fiber proteins	SEED	-	-	-	-	hypothetial protein	ST64Tp50	100	100	dec	Head surface decoration protein Dec	(Gilcrease et al. 2005)

## Sheet: Literature, tRNA
In the litterature
Source	Name	Strand	CDS start	CDS stop	References
From literature	Dec decoration protein	+	40256	40660	(Gilcrease, E.B., et al., Nucleotide sequence of the head assembly gene cluster of bacteriophage L and decoration protein characterization. J Bacteriol, 2005. 187(6): p. 2050-7.)
From literature	pac site	+	264	268	(Leavitt, J.C., Gilcrease, E.B., Wilson, K. and Casjens, S.R. (2013) Function and horizontal transfer of the small terminase subunit of the tailed bacteriophage Sf6 DNA packaging nanomotor. Virology, 440, 117-133.) (Wu, H., Sampson, L., Parr, R. and Casjens, S. (2002) The DNA site utilized by bacteriophage P22 for initiation of DNA packaging. Mol. Microbiol., 45, 1631-1646.)
From literature	putative ori	+	31649	31725	(Tsurimoto, T. and Matsubara, K. (1981) Purified bacteriophage lambda O protein binds to four repeating sequences at the lambda replication origin. Nucleic Acids Res., 9, 1789-1799.) (Wickner, S. (1984) Oligonucleotide synthesis by Escherichia coli dnaG primase in conjunction with phage P22 gene 12 protein. J. Biol. Chem., 259, 14044-14047.)
tRNA predictions
Algorithm	Name	Strand	CDS start	CDS stop	tRNA description
tRNAscan-SE	tyr tRNA (ATA)	+	19823	19903	this is only a fragment of a tRNA gene, so it will not be annotated as a tRNA
tRNAscan-SE	asn tRNA (GTT)	+	37837	37911
tRNAscan-SE	tRNA (NNN)	+	37917	37988	Checking the secondary structure, this can be annotated as a tRNA leu (TAA)

## Sheet: Rho-independent terminator pred
	Arnold						Softberry (FindTerm)
	Start	Program	Strand	Sequence			Strand	Start	Length	Score	Local sequence
T1	4090	Rnamotif	-	TACGGCATTGCTGCGGGCGTCCTGCGcTTTCATTAGCCA		TS1	-	1454	38	-14.8	ucuuucggcuuucUUUUCUUUUaggggcguggcuaaucuggucaugcgucuccugcuauu
T2	5889	Rnamotif	-	CAAATAAGAAAGGGGCCGAAGCCCCTGTTAGTTACGC		TS2	+	5900	25	-12.8	gugccauacguccuccuucgucucuggcagcgggaAAUUACCUAcuggcgaccgaucaca
T3	5890	Both	+	CGTAACTAACAGGGGCTTCGGCCCCTTTCTTATTTGA		TS3	-	12736	37	-13.7	uacagucuccucuuuCCUGUGUUUacgguggcggucgacuccgccgucacgucgcacaua
T4	13890	Erpin	-	TCGAAAAAAATAGCCCGGCGAACCGGGCTTTACTCATTTTTT		TS4	+	13903	28	-15.2	uuuagagcguaucaccagaaaauuacgggccggauggaaacgucuggucgauauccugaauCAACCAGGAgugccguguaauggauaaaucacuuauggcuauucagucuaaauucgcaa
T5	13892	Both	+	AAAATGAGTAAAGCCCGGTTCGCCGGGCTaTTTTTTTCGATAG		TS5	+	16314	39	-16.1	cguuggcccauacuguugagaaacgugacgcggaauuuaucgccgcagccaaccccgccaccaugcuggcgcugcuggaugagCUGGAAACCaaagaggaacagcgcgccaauugguuuc
T6	14292	Rnamotif	-	AACAACTACGTTGGCAGTGATATCTGTCATTTAATGTGCTC		TS6	+	16587	44	-11	gauucagccgggauuaugccgaggguuggugugcugguaaugauaaugcgauacacgaaauACGCACCGCuggcaucaagguuaaggggugaguauggcuaagacacaaaugcagcuagc
T7	14856	Rnamotif	+	TAGGCAAAGGTTCCCGCATTGCCGGGGTTTTTATGGAAA		TS7	-	16883	46	-12.4	gagccacgcauauaaccacuaaAAUCUUUUUaguaaccagguuacuacuuuuuguaacuacgguuauuuuaauuuugaugaucguucuugaaacaaaagaauaaaaguagagaaaacuaa
T8	15118	Both	+	AGTTCATCGGGCTAGCGGTCTAATGGCTGGTTTTTTGTTTAG		TS8	+	19282	49	-21.8	auacgacaccauuaacgaucaacgaaauucaauccuaaccacagccgcugaaaagguuggcGCAAACGCAuggacuacaaccaguagcugggguggagaaggcggacuucuacaaagcuu
T9	16308	Both	-	TAAAATAAAAATGGGTGTTTACACCCATTTTTATTACATA		TS9	-	19616	43	-13.6	ucuacucguauagacgcuugguaaagcuaucugagggucgguggguaaaggacguUAUGGCUUUagccuugcggucggacuugauuggucgaacgggugcacacggaguccaguacuuuu
T10	16310	Both	+	TGTAATAAAAATGGGTGTAAACACCCATTTTTATTTTAT		TS10	-	21485	25	-12.5	agagGUUAUUUUUuggcgguaguccgccgaaccacaagaaagucaagaaguuaagcuuau
T11	21483	Rnamotif	-	AGAACACCAAGCCGCCTGATGGCGGTTTTTTATTGGA		TS11	+	22232	37	-13.1	uuuacaggauccgauagaaguuaucccucaucucauugagaaguggcaggcuggcgcggAUAUGGUGCuggcuaagcgcucagaccgcucaacugaugggagguugaagcguaagacagc
T12	22545	Rnamotif	+	CTTTCGGCTCCGGCCACTGGCGGGCCTTGTTTATCGCC		TS12	+	26936	37	-16.6	ucauagccuuuugaaccacaaagaucuccggccuuggccugacacauagcccaugaaccaccuacuccagagcauucuaugguAUAUGCCUCucuuccaucuggagcauacguuuuuguu
T13	24023	Rnamotif	+	CCTTGATGCCAGCGGTGCGTATTTCGTGTATCGCaTTATCATTACCA		TS13	-	27274	30	-15.5	uacggucugugcauuaaaguauaaaggagguccAUUUUUCUUacggcggguauaucucgccguuuauuguaguucccuacuaaaaagcuaauuggucuugcucagcagcaggagcgaacc
T14	25549	Rnamotif	+	TCGCTCCATCTTGGCTTAACGAATGCCGTTTTTAATGACA		TS14	-	27995	26	-14.4	acgacuuaaguacaacaauaaggaauuuaaaaccGUUAUUUUUuccggcguaacgcugga
T15	26537	Rnamotif	+	TACATTGCCTCTGTCAGGTGATACTGACGTTTTAACCTGCT		TS15	-	29185	25	-12	uugacuuaccuuuuuuauaaaaccAUAAUUUUUugggcguauccgcccgauccccucccu
T16	26890	Both	-	CATATCCACAGCGCTTCATATCGAGGCGTTTTAGCTATGC		TS16	-	30571	40	-21.2	cgagugguccgcugaacgauggauggacugUUUUCUUUUucggggcuucuugccgcuuaagaagcuccggacuacaucuuucugaccuaguuagguguccucauuaauacgguuuuguug
T17	26925	Erpin	+	ATATGCGATAAAACAGCCGCACTCAGGCGGCGGCTGTTgTTTCTTCTTTCAG		TS17	-	31284	43	-12.7	cagguugcuaacagguauuuguuAUUAUAUUUauuauagagauuaugauugcauaaucucucauggcgucgucugcuuuuaggacuguucuuuuuuagccgagagucaacaguccuacaa
T18	26925	Both	-	AGAAGAAACAACAGCCGCCGCCTGAGTGCGGCTGTTTTATCGCATAT		TS18	-	31331	47	-16.6	ucauggcgucGUCUGCUUUuaggacuguucuuuuuuagccgagagucaacaguccuacaa
T19	26927	Rnamotif	+	ATGCGATAAAACAGCCGCACTCAGGCGGCGGCTGTTGTTTCTTCTT		TS19	+	33141	33	-14	ccaaagcagacgaugaaaucucgccaugaaccuaugccaauuauCCCGUCAGGcugcgau
T20	26928	Both	-	AAACAACAGCCGCCGCCTGAGTGCGGCTGTTTTATCGCA		TS20	-	35205	45	-13.4	uuguguccuaaagauagaaucuggucaauugacuuaccacacacCUACGUUUUccgcauucggguuauaaacuauggucuggagaggcgcggcgguacuaacagaaagaguacuacgucc
T21	27270	Both	-	TTGATGTTATTTGCCGCTCTATATGGGCGGCATTCTTTTTACCTG
T22	27991	Both	-	AATATCTAATCAGGTCGCAATGCGGCCTTTTTTATTGCCAA
T23	28347	Rnamotif	+	AATTGATTTTCCGCGCTGCTTCTGTACGGCGTGTATTTTATTTCC
T24	28408	Rnamotif	+	CGGTAGTAAATGCGGTTCTTCTTAACCGCTGTTACTTCAAC
T25	29183	Both	-	CCCTCCCCTAGCCCGCCTATGCGGGTTTTTTAATACC
T26	30568	Both	-	TTCTACATCAGGCCTCGAAGAATTCGCCGTTCTTCGGGGCTTTTTCTTTTGTC
T27	31855	Rnamotif	-	CATCGAAAAGCGTCAGGCCATCTACTGGCTTTTGCTCCCGG
T28	31899	Both	+	TGGAGCGTAAATCGTTAACGGTGTCAGTTGGCGGTTTTGCTTATAT
T29	33130	Both	+	GAGCTAATAACAGGCCTGCTGGTAATCGCAGGTCTTTTTATTTGGGGG
T30	36023	Rnamotif	-	CAATTTTATTCGGTATGTTTTCATGCCTTAATCTTCCCC
T31	36553	Both	+	GCTAGGTATCACGCCATCGTTAACGGCGTTTTAATGATTC
T32	37315	Both	+	TTAGAGGGTAAGCTGCCGTTAGTGACTCTTAAGTTGCAACGGTGGCTTTTTTATTTGGG
T33	37575	Rnamotif	+	CTTATCTTCTTGCCCACCTAGCCGTGGGCTTTTCATTCAGG
T34	38542	Rnamotif	-	CGCTACGTCACGTTGACGCTTCTGCATGTCAGCTATTGTTAGATT
T35	39018	Rnamotif	-	CACAAAGAATCTTTTTTGCCATAAGGCAGGAGGTTCATCTTTCAG
